# Supplementary material for: Plasma Metabolome Normalization in Rheumatoid Arthritis Following Initiation of Methotrexate and the Identification of Metabolic Biomarkers of Efficacy
Source: MDPI journal article supplement (doi:10.3390/metabo11120824), 2021-11-30
Supplement: s1 [file s1]

## Supplementary Materials:

**Table S1.** Metabolites associated with induction of RA. Lysophosphatidylcholines (LPC); carnitines (CAR); fatty acid (FA), phosphatidylinositol (PI); ceramides (Cer); phosphatidylethanolamines (PE-P, PE); triglycerides (TG); sphingomyelins (SM); phosphatidylcholine (PC); glucosyl ceramide (GlcCer).

| Control V. Disease      |                           |         |            |            |
|-------------------------|---------------------------|---------|------------|------------|
| Compound                | Class                     | FC      | q value    | p value    |
| Orthanilic Acid         | Sulfanilic Acids          | 2.901   | 3.33E-06   | 3.09E-09   |
| Homogentisic Acid       | Carbocyclic Acids         | 0.29183 | 3.33E-06   | 1.01E-08   |
| Glyceric Acid           | Sugar Acids               | 1.7908  | 5.50E-06   | 2.52E-08   |
| Succinic Acid           | Succinates                | 2.6532  | 1.06E-05   | 6.08E-08   |
| 2-Hydroxyglutaric Acid  | Glutarates                | 2.6508  | 2.71E-05   | 2.09E-07   |
| Methionine              | Sulfur Amino Acids        | 0.57353 | 7.97E-05   | 6.71E-07   |
| Malic Acid              | Dicarboxylic Acids        | 2.0396  | 8.70E-05   | 9.33E-07   |
| Erythronolactone        | Butyrates                 | 2.1319  | 0.00010942 | 1.31E-06   |
| CAR 18:1                | Carnitine                 | 4.2412  | 0.00022897 | 1.74E-06   |
| FA 22:2                 | Unsaturated Fatty Acids   | 2.1546  | 0.00023179 | 3.57E-06   |
| Maltose                 | Disaccharides             | 1.6945  | 0.00024359 | 8.72E-07   |
| 2,5-Dihydroxypyrazine   | Pyridine                  | 1.55    | 0.00024359 | 4.14E-06   |
| Gluconic Acid           | Gluconates                | 1.7402  | 0.00025468 | 4.30E-06   |
| CAR 16:0                | Carnitine                 | 3.9316  | 0.00043715 | 4.87E-06   |
| Fumaric Acid            | Dicarboxylic Acids        | 1.7082  | 0.00046031 | 1.06E-05   |
| Arginine                | Basic Amino Acids         | 0.38853 | 0.00046031 | 3.34E-06   |
| Glycolic acid           | Glycolates                | 1.5059  | 0.00053909 | 9.39E-06   |
| PI 38:5                 | Phosphatidylinositol      | 0.53416 | 0.00056993 | 1.51E-05   |
| FA 18:3                 | Unsaturated Fatty Acids   | 2.9349  | 0.00057437 | 1.67E-05   |
| Maltotriitol            | Sugar Alcohol             | 1.7518  | 0.00057437 | 1.76E-05   |
| CAR 18:0                | Carnitine                 | 2.1031  | 0.00072055 | 1.68E-05   |
| Methylacetate           | Acetates                  | 2.0544  | 0.0008323  | 1.89E-05   |
| Cer d34:1               | Unsaturated Ceramides     | 1.3169  | 0.0011778  | 3.64E-05   |
| FA 24:1                 | Unsaturated Fatty Acids   | 1.5473  | 0.00121    | 3.80E-05   |
| Mannose                 | Sugar Alcohol             | 1.895   | 0.001296   | 4.88E-05   |
| Cer d36:1               | Unsaturated Ceramides     | 1.5172  | 0.0013425  | 4.55E-05   |
| CAR 18:2                | Carnitine                 | 4.6587  | 0.0014412  | 3.14E-05   |
| 8-Oxo-2-Deoxyadenosine  | Adenosine                 | 3.0792  | 0.0014412  | 6.16E-05   |
| FA 16:1                 | Unsaturated Fatty Acids   | 2.7461  | 0.0015777  | 6.16E-05   |
| FA 17:1                 | Unsaturated Fatty Acids   | 2.3176  | 0.0017515  | 6.42E-05   |
| FA 20:1                 | Unsaturated Fatty Acids   | 2.1846  | 0.0017515  | 7.84E-05   |
| Indole-3-Propionic Acid | Microbiota                | 0.38781 | 0.0017515  | 7.94E-05   |
| 2-Monoolein             | Diglycerides              | 1.6204  | 0.0022803  | 7.67E-05   |
| 6,7-Dihydroxycoumarin   | Umbelliferones            | 1.5988  | 0.0023616  | 0.00012244 |
| Alpha-Ketoglutarate     | Glutarates                | 2.0982  | 0.0027137  | 0.000133   |
| Trehalose               | Sugar Alcohol             | 1.6382  | 0.0027761  | 8.40E-05   |
| 2-Deoxyribose           | Deoxy Sugars              | 2.2308  | 0.0028089  | 0.00010979 |
| PE P-40:4               | Phosphatidylethanolamines | 1.6882  | 0.0028089  | 0.0001503  |
| Cer d38:1               | Unsaturated Ceramides     | 1.4116  | 0.0038495  | 0.00022566 |

|                            |                           |         |           |            |
|----------------------------|---------------------------|---------|-----------|------------|
| Cer d42:2                  | Unsaturated Ceramides     | 1.2926  | 0.004203  | 0.0002011  |
| LPC P-18:0                 | Saturated LPC             | 1.749   | 0.0047125 | 0.00028698 |
| Isothreonic Acid           | Carboxylic Acids          | 1.4529  | 0.0052189 | 0.00033168 |
| FA 18:2                    | Unsaturated Fatty Acids   | 1.944   | 0.005456  | 0.00035482 |
| Phosphate                  | Polymer                   | 1.6893  | 0.005456  | 0.00034795 |
| Tryptophan                 | Aromatic Amino Acid       | 0.6129  | 0.0057061 | 0.00037443 |
| FA 20:2                    | Unsaturated Fatty Acids   | 2.051   | 0.005883  | 0.00039887 |
| TG 59:2                    | Unsaturated Triglycerides | 0.56996 | 0.005883  | 0.00042158 |
| 3,6-Anhydro-D-Galactose    | Methylgalactosides        | 2.6059  | 0.0093053 | 0.00044427 |
| FA 14:1                    | Unsaturated Fatty Acids   | 2.1018  | 0.0098197 | 0.0006105  |
| S-Adenosyl-homocysteine    | Adenosine                 | 1.7308  | 0.0098609 | 0.00068858 |
| TG 59:3                    | Unsaturated Triglycerides | 0.65035 | 0.0098609 | 0.00075036 |
| PE 36:3                    | Phosphatidylethanolamines | 0.6212  | 0.0098609 | 0.00070696 |
| Serotonin                  | Biogenic Monoamines       | 2.7097  | 0.009922  | 0.00045718 |
| PC 34:0                    | Phosphatidylethanolamines | 1.2176  | 0.010634  | 0.0008656  |
| Cellobiose                 | Sugar Alcohol             | 1.9029  | 0.010898  | 0.00086384 |
| Xylulose                   | Ketoses                   | 0.66478 | 0.01099   | 0.00063275 |
| LPC 20:1                   | Unsaturated LPC           | 1.6801  | 0.011215  | 0.0009049  |
| Indoxyl sulfate            | Indoles                   | 0.57382 | 0.011819  | 0.0010017  |
| Oleic Acid                 | Unsaturated Fatty Acids   | 2.7812  | 0.011883  | 0.00093652 |
| 2-Deoxytetronic Acid       | Carboxylic Acids          | 1.8825  | 0.012102  | 0.00086265 |
| Quinic Acid                | Carboxylic Acids          | 1.7894  | 0.015127  | 0.001364   |
| Proline                    | Imino Acids               | 0.69317 | 0.015895  | 0.0014497  |
| FA 17:0                    | Saturated Fatty Acids     | 1.4785  | 0.016269  | 0.0013936  |
| CAR 14:2                   | Carnitine                 | 1.7914  | 0.016858  | 0.0016445  |
| Isomaltose                 | Sugar Acids               | 0.70709 | 0.017565  | 0.0014128  |
| TG 46:4                    | Unsaturated Triglycerides | 0.50559 | 0.017959  | 0.0018278  |
| Methylsuccinic Acid        | Succinates                | 1.5209  | 0.018828  | 0.0017781  |
| Pyroglutamic Acid          | Dipeptides                | 1.2706  | 0.018828  | 0.0019676  |
| Galactonic Acid            | Sugar Acids               | 1.7212  | 0.019955  | 0.001799   |
| Citramalic Acid            | Dicarboxylic Acids        | 1.6452  | 0.021471  | 0.001837   |
| FA 14:0                    | Saturated Fatty Acids     | 1.563   | 0.021471  | 0.0022468  |
| Cer d40:2                  | Unsaturated Ceramides     | 1.4075  | 0.021471  | 0.002369   |
| Threonine                  | Amino Acids               | 0.68957 | 0.021533  | 0.0023896  |
| 2,3-Dihydroxybutanoic Acid | Sugar Acids               | 0.56986 | 0.021566  | 0.0022734  |
| Phenylalanine              | Aromatic Amino Acids      | 0.82718 | 0.022098  | 0.002455   |
| Canrenone                  | Steroid                   | 0.53944 | 0.022098  | 0.0025844  |
| 3-Hydroxybutyric acid      | Hydroxybutyrates          | 2.7853  | 0.023245  | 0.0022229  |
| TG 46:3                    | Unsaturated Triglycerides | 0.50138 | 0.024382  | 0.0029347  |
| SM d42:2                   | Sphingomyelins            | 1.3379  | 0.024465  | 0.0029545  |
| Indole-3-carboxaldehyde    | Indoles                   | 0.67316 | 0.024832  | 0.0030554  |
| TG 57:2                    | Unsaturated Triglycerides | 0.64429 | 0.025268  | 0.003083   |
| Pyruvic acid               | Carboxylic Acids          | 1.8856  | 0.032598  | 0.0035975  |
| SM d36:3                   | Sphingomyelins            | 0.72675 | 0.032598  | 0.0039276  |
| 4-Acetylbutyric acid       | Adipates                  | 0.67028 | 0.035547  | 0.0040286  |
| Cer d40:1                  | Unsaturated Ceramides     | 1.282   | 0.035828  | 0.0044308  |
| TG 62:4                    | Unsaturated Triglycerides | 0.69618 | 0.035828  | 0.0047119  |
| Ribonic Acid               | Glutarates                | 1.5127  | 0.037173  | 0.0048206  |

|                          |                           |         |          |           |
|--------------------------|---------------------------|---------|----------|-----------|
| Inositol-4-Monophosphate | Inositol Phosphates       | 0.75597 | 0.037382 | 0.0050257 |
| TG 60:5                  | Unsaturated Triglycerides | 0.71859 | 0.038029 | 0.0050994 |
| Isoleucine               | Branched Amino Acids      | 0.76345 | 0.038483 | 0.0052252 |
| TG 46:5                  | Unsaturated Triglycerides | 0.70891 | 0.038664 | 0.0049724 |
| Lactosylceramide d18:1   | Lactosyl Ceramide         | 1.3825  | 0.039516 | 0.0054443 |
| PC 38:7                  | Phosphatidylethanolamines | 0.72331 | 0.039825 | 0.0056433 |
| TG 64:3                  | Unsaturated Triglycerides | 0.74952 | 0.040082 | 0.0051105 |
| LPC O-16:0               | Lysophosphatidylcholine   | 1.5051  | 0.040854 | 0.0058803 |
| Ethanolamine             | Ethanolamines             | 1.2598  | 0.040854 | 0.0060548 |
| TG 56:0                  | Saturated Triglycerides   | 0.74476 | 0.040854 | 0.0059091 |
| PC 34:3                  | Phosphatidylcholine       | 0.71916 | 0.041441 | 0.0062682 |
| 3-Methylhistidine        | Histidine                 | 0.31949 | 0.041441 | 0.006094  |
| TG 56:1                  | Unsaturated Triglycerides | 0.39071 | 0.043122 | 0.0065553 |
| TG 54:0                  | Saturated Triglycerides   | 0.62508 | 0.043428 | 0.0067656 |
| Choline                  | Ethanolamines             | 1.411   | 0.043686 | 0.0061232 |
| Cer d34:2                | Unsaturated Ceramides     | 1.2055  | 0.045997 | 0.0072871 |
| TG 44:2                  | Unsaturated Triglycerides | 0.41224 | 0.047585 | 0.0075854 |
| Lactamide                | Amides                    | 2.1543  | 0.047615 | 0.0065618 |
| PE 36:2                  | Phosphatidylethanolamines | 0.75952 | 0.04832  | 0.0072815 |
| 5-Hydroxymethylcytosine  | Pyrimidine                | 0.6565  | 0.049225 | 0.0079814 |
| TG 60:1                  | Unsaturated Triglycerides | 0.50021 | 0.049225 | 0.0081749 |
| Arabitol                 | Sugar Alcohol             | 1.1711  | 0.051924 | 0.008802  |
| Ornithine                | Basic Amino Acids         | 0.70016 | 0.051924 | 0.0082201 |
| TG 58:1                  | Unsaturated Triglycerides | 0.47291 | 0.051924 | 0.0088563 |
| TG 57:1                  | Unsaturated Triglycerides | 0.63338 | 0.052697 | 0.0091532 |
| TG 47:2                  | Unsaturated Triglycerides | 0.58704 | 0.052697 | 0.009184  |
| TG 58:4                  | Unsaturated Triglycerides | 0.71097 | 0.05292  | 0.0093097 |
| Creatinine               | Imidazoles                | 0.81286 | 0.053308 | 0.0093815 |
| Phenylacetyl glycine     | Dipeptides                | 0.58673 | 0.053308 | 0.0093414 |
| TG 45:1                  | Unsaturated Triglycerides | 0.45352 | 0.053364 | 0.0092744 |
| TG 42:2                  | Unsaturated Triglycerides | 0.39772 | 0.053364 | 0.0096214 |
| SM d43:2                 | Sphingomyelins            | 1.3957  | 0.05347  | 0.0098914 |
| TG 50:6                  | Unsaturated Triglycerides | 0.69975 | 0.05347  | 0.0098154 |
| TG 55:1                  | Unsaturated Triglycerides | 0.55863 | 0.053794 | 0.0097392 |
| CAR 14:1                 | Carnitine                 | 1.686   | 0.055306 | 0.010474  |
| Piperine                 | Polyunsaturated Alkamides | 0.28225 | 0.055306 | 0.010255  |
| PC 42:6                  | Phosphatidylcholines      | 0.66338 | 0.056759 | 0.010627  |
| 4-Hydroxyhippuric acid   | Hippurates                | 0.67826 | 0.057844 | 0.010821  |
| PC 40:6                  | Phosphatidylcholines      | 0.84222 | 0.061047 | 0.012004  |
| TG 62:3                  | Unsaturated Triglycerides | 0.67907 | 0.061047 | 0.011784  |
| TG 48:4                  | Unsaturated Triglycerides | 0.56497 | 0.061047 | 0.012051  |
| TG 60:4                  | Unsaturated Triglycerides | 0.59177 | 0.061511 | 0.012225  |
| Aconitic Acid            | Succinates                | 2.2715  | 0.063219 | 0.0099351 |
| Cer d42:1                | Unsaturated Ceramides     | 1.2204  | 0.063219 | 0.012738  |
| Cysteine                 | Sulfur Amino Acids        | 1.4085  | 0.064226 | 0.012582  |
| TG 42:3                  | Unsaturated Triglycerides | 0.45987 | 0.064923 | 0.013125  |
| N-Methylvaline           | Branched Amino Acids      | 0.78889 | 0.066051 | 0.013885  |
| gamma-Glutamylleucine    | Dipeptides                | 0.75446 | 0.066051 | 0.013663  |

|                         |                           |         |          |          |
|-------------------------|---------------------------|---------|----------|----------|
| TG 48:3                 | Unsaturated Triglycerides | 0.59209 | 0.066051 | 0.013898 |
| TG 46:2                 | Unsaturated Triglycerides | 0.47971 | 0.066051 | 0.013853 |
| Leucine                 | Branched Amino Acids      | 0.76988 | 0.066432 | 0.013949 |
| PC 36:6                 | Phosphatidylethanolamines | 0.70866 | 0.066432 | 0.014186 |
| PC 38:6                 | Phosphatidylethanolamines | 0.80739 | 0.067752 | 0.01447  |
| Quinolone               | Hydroxyquinolines         | 2.2462  | 0.071746 | 0.014157 |
| TG 48:5                 | Unsaturated Triglycerides | 0.6636  | 0.071746 | 0.015682 |
| PE P-40:5               | Phosphatidylethanolamines | 1.3202  | 0.072109 | 0.01565  |
| TG 56:2                 | Unsaturated Triglycerides | 0.55435 | 0.073052 | 0.016169 |
| SM d44:2                | Sphingomyelins            | 1.2742  | 0.073249 | 0.016496 |
| 10-Hydroxydecanoic acid | Saturated Fatty Acids     | 0.51411 | 0.073249 | 0.015655 |
| Acetylcarnitine         | Carnitine                 | 1.289   | 0.073283 | 0.016741 |
| TG 58:2                 | Unsaturated Triglycerides | 0.54647 | 0.073283 | 0.016829 |
| Taurocholic acid        | Taurine                   | 0.26118 | 0.073283 | 0.016704 |
| TG 60:3                 | Unsaturated Triglycerides | 0.5902  | 0.076333 | 0.017607 |
| TG 53:0                 | Saturated Triglycerides   | 0.69101 | 0.078977 | 0.018305 |
| PE 34:2                 | Phosphatidylethanolamines | 0.68127 | 0.08005  | 0.018553 |
| TG 45:0                 | Saturated Triglycerides   | 0.50201 | 0.080355 | 0.016738 |
| Threonic Acid           | Carboxylic Acids          | 0.70598 | 0.081449 | 0.019132 |
| TG 64:2                 | Unsaturated Triglycerides | 0.75451 | 0.082143 | 0.019015 |
| LPC 16:0                | Saturated LPC             | 1.4178  | 0.08298  | 0.019032 |
| Histidine               | Cyclic Amino Acids        | 0.78943 | 0.08298  | 0.020183 |
| PE 38:6                 | Phosphatidylethanolamines | 0.61346 | 0.08298  | 0.019249 |
| Glycerol-3-Galactoside  | Sugar Alcohol             | 0.78002 | 0.084157 | 0.019529 |
| TG 44:1                 | Unsaturated Triglycerides | 0.33049 | 0.084861 | 0.020591 |
| TG 44:0                 | Saturated Triglycerides   | 0.28817 | 0.08554  | 0.020627 |
| SM d34:1                | Sphingomyelins            | 1.1778  | 0.085696 | 0.020634 |
| TG 42:0                 | Saturated Triglycerides   | 0.25815 | 0.085696 | 0.020738 |
| PC 38:4                 | Phosphatidylethanolamines | 0.87227 | 0.086678 | 0.02166  |
| N8-Acetylspermidine     | Spermidine                | 1.405   | 0.090285 | 0.022825 |
| Allantoin               | Hydantoins                | 0.77843 | 0.090911 | 0.023428 |
| TG 62:1                 | Unsaturated Triglycerides | 0.65493 | 0.090911 | 0.023271 |
| Lactic Acid             | Hydroxybutyrates          | 1.6265  | 0.091531 | 0.023927 |
| LPC 18:0                | Saturated LPC             | 1.4235  | 0.091531 | 0.023856 |
| PE O-38:5               | Phosphatidylethanolamines | 1.2954  | 0.091531 | 0.023792 |
| TG 58:3                 | Unsaturated Triglycerides | 0.60576 | 0.091531 | 0.023668 |
| 1-Methylnicotinamide    | Pyridines                 | 0.1484  | 0.09267  | 0.021318 |
| N-Methylalanine         | Dipeptides                | 1.5189  | 0.094783 | 0.024901 |
| TG 48:2                 | Unsaturated Triglycerides | 0.64105 | 0.094783 | 0.025045 |
| TG 60:2                 | Unsaturated Triglycerides | 0.57778 | 0.094783 | 0.02557  |
| TG 42:1                 | Unsaturated Triglycerides | 0.2822  | 0.094783 | 0.025727 |
| Sophorose               | Disaccharides             | 1.5814  | 0.097388 | 0.023399 |
| Valine                  | Branched Amino Acids      | 0.80343 | 0.098654 | 0.027212 |
| Methionine Sulfoxide    | Sulfur Amino Acids        | 0.77731 | 0.098654 | 0.027156 |
| PE P-40:7               | Phosphatidylethanolamines | 0.79777 | 0.098841 | 0.026856 |
| Phloroglucinol          | Phenols                   | 1.4247  | 0.099884 | 0.026457 |
| P-Toluenesulfonic acid  | Polystyrenes              | 0.46157 | 0.10142  | 0.026968 |
| GlcCer d42:2            | Glycosphingolipid         | 1.3458  | 0.10234  | 0.027299 |

|                                   |                           |         |         |          |
|-----------------------------------|---------------------------|---------|---------|----------|
| LPC 20:0                          | Saturated LPC             | 1.3048  | 0.10415 | 0.029796 |
| TG 50:5                           | Unsaturated Triglycerides | 0.6744  | 0.10415 | 0.029888 |
| TG 46:1                           | Unsaturated Triglycerides | 0.42833 | 0.10415 | 0.030725 |
| Glycocholate                      | Chenodeoxycholic Acid     | 0.522   | 0.10788 | 0.031133 |
| TG 58:0                           | Saturated Triglycerides   | 0.82917 | 0.10829 | 0.032506 |
| TG 47:1                           | Unsaturated Triglycerides | 0.54315 | 0.11214 | 0.033756 |
| TG 52:0                           | Saturated Triglycerides   | 0.61071 | 0.11526 | 0.033959 |
| 3-(3-Hydroxyphenyl)propionic Acid | Carboxylic Acids          | 0.60326 | 0.11526 | 0.033756 |
| PC 31:1                           | Phosphatidylethanolamines | 0.70986 | 0.11951 | 0.035375 |
| TG 47:0                           | Saturated Triglycerides   | 0.56843 | 0.12033 | 0.034554 |
| Histamine                         | Biogenic Monoamines       | 1.5249  | 0.12247 | 0.036615 |
| CAR 10:0                          | Carnitine                 | 1.8909  | 0.12254 | 0.036972 |
| TG 62:2                           | Unsaturated Triglycerides | 0.68665 | 0.12254 | 0.036972 |
| 5'-Methylthioadenosine            | Adenosine                 | 0.7985  | 0.13116 | 0.038678 |
| TG 54:1                           | Unsaturated Triglycerides | 0.40997 | 0.13163 | 0.039151 |
| TG 40:0                           | Saturated Triglycerides   | 0.3011  | 0.13178 | 0.039646 |
| TG 60:6                           | Unsaturated Triglycerides | 0.72232 | 0.13249 | 0.039913 |
| 4-Pyridoxic acid                  | Pyridines                 | 0.33111 | 0.13884 | 0.042597 |
| PC P-44:5                         | Phosphatidylethanolamines | 1.2935  | 0.14103 | 0.042816 |
| TG 40:1                           | Unsaturated Triglycerides | 0.34432 | 0.14192 | 0.043432 |
| Glutamic acid                     | Acidic Amino Acids        | 1.4103  | 0.14353 | 0.044584 |
| LPC 20:2                          | Unsaturated LPC           | 1.3889  | 0.14432 | 0.044993 |
| Cer d33:1                         | Unsaturated Ceramides     | 1.155   | 0.14432 | 0.045316 |
| Nudifloramide                     | Pyridines                 | 0.57827 | 0.14432 | 0.045971 |
| PE 36:1                           | Phosphatidylethanolamines | 0.81628 | 0.1445  | 0.046514 |
| PE 36:4                           | Phosphatidylethanolamines | 0.71772 | 0.1445  | 0.046826 |
| Urocanic Acid                     | Acrylates                 | 0.42485 | 0.1445  | 0.043432 |
| TG 49:3                           | Unsaturated Triglycerides | 0.77176 | 0.14659 | 0.047286 |
| CAR 8:0                           | Carnitine                 | 1.6333  | 0.14973 | 0.048836 |
| LPE 18:2                          | Unsaturated LPC           | 0.80024 | 0.14973 | 0.047749 |
| LPC P-16:0                        | Saturated LPC             | 1.412   | 0.15166 | 0.049983 |

**Table S2.** Metabolites associated with MTX therapy. Phosphatidylcholine (PC); triglycerides (TG); fatty acid (FA); phosphatidylethanolamine (PE); ceramides (Cer); sphingomyelin (SM); carnitine (CAR).

| <b>Baseline V. Week16</b>     |                           |           |                |                |
|-------------------------------|---------------------------|-----------|----------------|----------------|
| <b>Compound</b>               | <b>Class</b>              | <b>FC</b> | <b>q value</b> | <b>p value</b> |
| TG 44:0                       | Saturated Triglycerides   | 2.3958    | 0.092056       | 0.0023989      |
| TG 46:2                       | Unsaturated Triglycerides | 2.1341    | 0.092056       | 0.0028469      |
| TG 46:1                       | Unsaturated Triglycerides | 2.0986    | 0.092056       | 0.0022139      |
| TG 42:0                       | Saturated Triglycerides   | 2.0916    | 0.092056       | 0.0070592      |
| TG 42:1                       | Unsaturated Triglycerides | 2.0915    | 0.092056       | 0.0042266      |
| TG 56:1                       | Unsaturated Triglycerides | 2.0803    | 0.092056       | 0.0037114      |
| TG 44:1                       | Unsaturated Triglycerides | 2.0603    | 0.092056       | 0.0016353      |
| TG 44:2                       | Unsaturated Triglycerides | 2.0039    | 0.092056       | 0.0031098      |
| TG 42:3                       | Unsaturated Triglycerides | 1.9323    | 0.092056       | 0.00088467     |
| TG 48:3                       | Unsaturated Triglycerides | 1.8165    | 0.092056       | 0.0021025      |
| TG 52:0                       | Saturated Triglycerides   | 1.7765    | 0.092056       | 0.0035328      |
| TG 46:3                       | Unsaturated Triglycerides | 1.7762    | 0.092056       | 0.0012508      |
| TG 54:0                       | Saturated Triglycerides   | 1.7188    | 0.092056       | 0.0038774      |
| TG 56:2                       | Unsaturated Triglycerides | 1.6464    | 0.092056       | 0.0036265      |
| TG 48:2                       | Unsaturated Triglycerides | 1.6087    | 0.092056       | 0.0014044      |
| TG 47:2                       | Unsaturated Triglycerides | 1.5807    | 0.092056       | 0.0006393      |
| TG 45:1                       | Unsaturated Triglycerides | 1.5532    | 0.092056       | 0.00015114     |
| TG 51:0                       | Saturated Triglycerides   | 1.539     | 0.092056       | 0.0039449      |
| TG 59:2                       | Unsaturated Triglycerides | 1.5258    | 0.092056       | 0.0027912      |
| TG 47:1                       | Unsaturated Triglycerides | 1.5249    | 0.092056       | 0.00053116     |
| TG 49:0                       | Saturated Triglycerides   | 1.4717    | 0.092056       | 0.0038425      |
| TG 48:1                       | Unsaturated Triglycerides | 1.4299    | 0.092056       | 0.0040456      |
| TG 49:2                       | Unsaturated Triglycerides | 1.3976    | 0.092056       | 0.0039749      |
| TG 47:0                       | Saturated Triglycerides   | 1.3943    | 0.092056       | 0.0023622      |
| TG 49:3                       | Unsaturated Triglycerides | 1.394     | 0.092056       | 0.0037036      |
| TG 45:0                       | Saturated Triglycerides   | 1.3606    | 0.092056       | 0.0015816      |
| TG 56:3                       | Unsaturated Triglycerides | 1.3594    | 0.092056       | 0.0042737      |
| TG 55:2                       | Unsaturated Triglycerides | 1.3285    | 0.092056       | 0.0024901      |
| TG 54:2                       | Unsaturated Triglycerides | 1.306     | 0.092056       | 0.0036085      |
| Oleic Acid                    | Unsaturated Fatty Acids   | 0.58722   | 0.092056       | 0.0034458      |
| FA 22:2                       | Unsaturated Fatty Acids   | 0.5811    | 0.092056       | 0.00032173     |
| TG 46:0                       | Saturated Triglycerides   | 1.8112    | 0.092351       | 0.004876       |
| TG 54:1                       | Unsaturated Triglycerides | 1.8016    | 0.092351       | 0.0047161      |
| TG 60:1                       | Unsaturated Triglycerides | 1.7225    | 0.092351       | 0.0050052      |
| TG 56:0                       | Saturated Triglycerides   | 1.5204    | 0.092351       | 0.0048823      |
| TG 57:2                       | Unsaturated Triglycerides | 1.3611    | 0.092351       | 0.0051306      |
| TG 40:1                       | Unsaturated Triglycerides | 1.5872    | 0.096741       | 0.0055238      |
| FA 17:1                       | Unsaturated Fatty Acids   | 0.54271   | 0.10624        | 0.00623        |
| TG 42:2                       | Unsaturated Triglycerides | 2.1488    | 0.11157        | 0.0070592      |
| TG 58:1                       | Unsaturated Triglycerides | 1.817     | 0.11157        | 0.0067734      |
| TG 55:1                       | Unsaturated Triglycerides | 1.4578    | 0.11157        | 0.0069148      |
| 2-Amino-3-Methoxybenzoic Acid | Aminobenzoates            | 0.3491    | 0.11239        | 0.0072844      |
| TG 57:1                       | Unsaturated Triglycerides | 1.5406    | 0.11342        | 0.0089949      |

|                                |                           |         |         |           |
|--------------------------------|---------------------------|---------|---------|-----------|
| TG 53:0                        | Saturated Triglycerides   | 1.4272  | 0.11342 | 0.0085777 |
| TG 49:1                        | Unsaturated Triglycerides | 1.3527  | 0.11342 | 0.0091019 |
| TG 52:1                        | Unsaturated Triglycerides | 1.3514  | 0.11342 | 0.0077572 |
| TG 58:4                        | Unsaturated Triglycerides | 1.3421  | 0.11342 | 0.0085074 |
| TG 62:4                        | Unsaturated Triglycerides | 1.3061  | 0.11342 | 0.00818   |
| PE 36:2                        | Phosphatidylethanolamines | 1.176   | 0.11342 | 0.0087321 |
| Cer d34:1                      | Unsaturated Ceramides     | 0.86931 | 0.11342 | 0.010168  |
| Cer d33:1                      | Unsaturated Ceramides     | 0.85115 | 0.11342 | 0.0087224 |
| FA 18:3                        | Unsaturated Fatty Acids   | 0.55334 | 0.11342 | 0.0088893 |
| TG 50:0                        | Saturated Triglycerides   | 1.585   | 0.1156  | 0.0097087 |
| TG 46:4                        | Unsaturated Triglycerides | 1.5561  | 0.1156  | 0.0098762 |
| Cer d34:2                      | Unsaturated Ceramides     | 0.87625 | 0.1156  | 0.010168  |
| FA 18:2                        | Unsaturated Fatty Acids   | 0.64154 | 0.1156  | 0.0099749 |
| FA 16:1                        | Unsaturated Fatty Acids   | 0.50124 | 0.1156  | 0.010062  |
| TG 55:3                        | Unsaturated Triglycerides | 1.2102  | 0.11827 | 0.010586  |
| Acetaminophen                  | Acetanilides              | 0.30246 | 0.11884 | 0.01082   |
| PC 32:0                        | Saturated PC              | 0.89428 | 0.12585 | 0.011684  |
| Dehydroisoandrosterone Sulfate | Dehydroepiandrosterone    | 0.619   | 0.12585 | 0.011847  |
| TG 48:4                        | Unsaturated Triglycerides | 1.7526  | 0.13166 | 0.0128    |
| Coniferylaldehyde              | Hydroxybenzoates          | 1.7306  | 0.13166 | 0.012766  |
| TG 53:1                        | Unsaturated Triglycerides | 1.4091  | 0.13243 | 0.013079  |
| TG 50:5                        | Unsaturated Triglycerides | 1.3718  | 0.13846 | 0.013996  |
| TG 50:2                        | Unsaturated Triglycerides | 1.2384  | 0.13846 | 0.014103  |
| TG 50:4                        | Unsaturated Triglycerides | 1.3978  | 0.14218 | 0.014832  |
| TG 58:0                        | Saturated Triglycerides   | 1.3398  | 0.14218 | 0.014985  |
| Succinic Acid                  | Succinates                | 0.7645  | 0.14218 | 0.015139  |
| SM d34:1                       | Sphingomyelins            | 0.91298 | 0.14272 | 0.015417  |
| TG 62:3                        | Unsaturated Triglycerides | 1.3886  | 0.14579 | 0.015974  |
| FA 14:1                        | Unsaturated Fatty Acids   | 0.54941 | 0.14579 | 0.016199  |
| TG 60:2                        | Unsaturated Triglycerides | 1.6606  | 0.1547  | 0.017427  |
| TG 48:0                        | Saturated Triglycerides   | 1.4988  | 0.17117 | 0.019548  |
| TG 51:1                        | Unsaturated Triglycerides | 1.3376  | 0.17314 | 0.020039  |
| TG 58:2                        | Unsaturated Triglycerides | 1.7279  | 0.17491 | 0.020669  |
| 1,3,7-Trimethyluric acid       | Xanthines                 | 1.5808  | 0.17491 | 0.02188   |
| TG 60:3                        | Unsaturated Triglycerides | 1.5422  | 0.17491 | 0.020912  |
| TG 50:3                        | Unsaturated Triglycerides | 1.2894  | 0.17491 | 0.022133  |
| TG 56:4                        | Unsaturated Triglycerides | 1.2344  | 0.17491 | 0.021721  |
| TG 54:3                        | Unsaturated Triglycerides | 1.1736  | 0.17491 | 0.021722  |
| SM 42:1;2O                     | Sphingomyelins            | 0.89673 | 0.17491 | 0.021246  |
| TG 48:5                        | Unsaturated Triglycerides | 1.4966  | 0.17783 | 0.022986  |
| Homogentisic acid              | Carbocyclic Acids         | 1.4852  | 0.17783 | 0.02307   |
| FA 17:0                        | Saturated Fatty Acids     | 0.76296 | 0.17783 | 0.023326  |
| TG 62:2                        | Unsaturated Triglycerides | 1.4538  | 0.1809  | 0.024227  |
| TG 51:5                        | Unsaturated Triglycerides | 1.2072  | 0.1809  | 0.024523  |
| TG 50:1                        | Unsaturated Triglycerides | 1.179   | 0.1809  | 0.024566  |
| TG 50:6                        | Unsaturated Triglycerides | 1.4258  | 0.19828 | 0.027234  |
| TG 62:1                        | Unsaturated Triglycerides | 1.5103  | 0.20451 | 0.028967  |
| PE 36:1                        | Phosphatidylethanolamines | 1.1333  | 0.20451 | 0.029351  |

|                          |                           |         |         |          |
|--------------------------|---------------------------|---------|---------|----------|
| Cer d34:0                | Saturated Ceramides       | 0.81584 | 0.20451 | 0.029249 |
| Heptadecanoic Acid       | Saturated Fatty Acids     | 0.80075 | 0.20451 | 0.029245 |
| TG 58:3                  | Unsaturated Triglycerides | 1.5593  | 0.20576 | 0.030042 |
| TG 55:4                  | Unsaturated Triglycerides | 1.1756  | 0.20576 | 0.030166 |
| Caffeine                 | Xanthine                  | 1.9604  | 0.20666 | 0.030674 |
| Tryptophan               | Aromatic Amino Acids      | 1.2714  | 0.20666 | 0.030964 |
| FA 15:1                  | Unsaturated Fatty Acids   | 0.71124 | 0.20666 | 0.031255 |
| TG 60:4                  | Unsaturated Triglycerides | 1.371   | 0.20957 | 0.032017 |
| Glycocholate             | Chenodeoxycholic Acid     | 1.5909  | 0.21491 | 0.033368 |
| Acetaminophen Sulfate    | Acetanilids               | 0.20726 | 0.21491 | 0.033496 |
| TG 60:6                  | Unsaturated Triglycerides | 1.1648  | 0.217   | 0.034158 |
| TG 40:0                  | Saturated Triglycerides   | 1.7548  | 0.22222 | 0.035322 |
| Phosphate                | Polymers                  | 0.79844 | 0.22283 | 0.035762 |
| TG 59:3                  | Unsaturated Triglycerides | 1.3231  | 0.22313 | 0.036407 |
| SM d42:2                 | Sphingomyelins            | 0.88994 | 0.22313 | 0.036499 |
| CAR 18:2                 | Carnitine                 | 0.70177 | 0.24336 | 0.040184 |
| 3-(2-Hydroxyethyl)indole | Indoles                   | 0.81471 | 0.24482 | 0.040803 |

---



**Table S3.** Chemometric enrichment analysis of metabolites associated with induction of RA.

| Cluster name                  | P Value    | Q Value    | Fractional Change | X LOG P     |
|-------------------------------|------------|------------|-------------------|-------------|
| Unsaturated Triglycerides     | 2.2E-20    | 1.2E-18    | 0.46067415        | 24.8615955  |
| Saturated Triglycerides       | 4.3E-10    | 0.00000001 | 0.61538461        | 22.8636429  |
| Unsaturated Ceramides         | 0.00000001 | 0.00000013 | 0.5625            | 15.5865     |
| Unsaturated Fatty Acids       | 0.00000006 | 0.00000074 | 0.588235294       | 8.73633333  |
| Carnitine                     | 0.00000007 | 0.00000074 | 0.714285714       | 4.303       |
| Hydroxybutyrates              | 0.00015    | 0.0014     | 0.666666667       | -0.0542     |
| Glutarates                    | 0.00035    | 0.0028     | 0.5               | -1.71433333 |
| Sugar Acids                   | 0.0011     | 0.0077     | 0.25              | -1.7295     |
| Sugar Alcohols                | 0.0014     | 0.0089     | 0.181818182       | -3.62690909 |
| Amino Acids, Branched-Chain   | 0.0021     | 0.012      | -0.4              | -1.4945     |
| Amino Acids, Basic            | 0.0024     | 0.012      | -0.333333333      | -3.692      |
| Carbocyclic Acids             | 0.0026     | 0.012      | 0                 | 0.2665      |
| Sphingomyelins                | 0.0029     | 0.013      | 0.068965517       | 14.756875   |
| Sat. Lysophosphatidylcholines | 0.0041     | 0.015      | 0.666666667       | 5.79766667  |
| Succinates                    | 0.0041     | 0.015      | 0.75              | -0.72       |
| Disaccharides                 | 0.0062     | 0.022      | 0.285714286       | -1.7295     |
| Butyrates                     | 0.013      | 0.041      | 0.333333333       | -2.76375    |
| Indoles                       | 0.013      | 0.041      | -0.333333333      | 0.8366      |
| Phosphatidylethanolamines     | 0.015      | 0.043      | -0.142857143      | 14.8576     |
| Adenosine                     | 0.024      | 0.067      | 0.5               | -1.9        |
| Ethanolamines                 | 0.041      | 0.11       | 0.666666667       | -1.14366667 |
| Biogenic Monoamines           | 0.047      | 0.12       | 0.666666667       | -0.4555     |

**Table S4.** Chemometric enrichment analysis of metabolites associated MTX Therapy.

| Cluster Name                     | P Values    | Q Value   | Fractional Change | X LOG P  |
|----------------------------------|-------------|-----------|-------------------|----------|
| Unsaturated Sphingomyelins       | 2.2E-20     | 1.2E-18   | -0.551724138      | 24.8616  |
| Unsaturated Triglycerides        | 1.1E-16     | 3.1E-15   | 0.359550562       | 15.68639 |
| Unsaturated Phosphatidylcholines | 5.3E-14     | 9.8E-13   | -0.174603175      | 15.65769 |
| Saturated Triglycerides          | 1.3E-13     | 1.9E-12   | 0.692307692       | 14.8576  |
| Unsaturated Ceramides            | 9.8E-13     | 1.1E-11   | -0.625            | 22.86364 |
| Unsaturated Fatty Acids          | 8E-12       | 7.4E-11   | -0.705882353      | 7.46525  |
| Unsat. Lysophosphatidylcholines  | 0.000000095 | 0.0000007 | -0.285714286      | 15.8855  |
| Cholesterol Esters               | 0.000000098 | 0.0000007 | -0.555555556      | 8.736333 |
| Plasmalogens                     | 0.00000033  | 0.000002  | -0.625            | -3.62691 |
| Phosphatidylinositols            | 0.0000078   | 0.000043  | -0.857142857      | 6.2037   |
| Saturated Fatty Acids            | 0.00027     | 0.0014    | -0.333333333      | 16.15725 |
| Dipeptides                       | 0.00041     | 0.0019    | -0.222222222      | -1.7295  |
| Sugar Alcohols                   | 0.00052     | 0.0023    | -0.272727273      | 15.42157 |
| Hydroxybutyrates                 | 0.00067     | 0.0027    | -0.333333333      | 13.61457 |
| Saturated Sphingomyelins         | 0.0014      | 0.0053    | -0.333333333      | 4.303    |
| Dicarboxylic Acids               | 0.0022      | 0.0079    | -0.428571429      | 5.797667 |
| Carnitine                        | 0.0027      | 0.0089    | -0.214285714      | -2.62333 |
| Succinates                       | 0.0052      | 0.016     | -0.75             | -0.0542  |

**Table S5.** Metabolite levels displaying a statistically significant inverse correlation ( $p < 0.05$ ) with DAS-28. Fatty Acid (FA); triglycerides (TG); lysophosphatidylethanolamides (LPE); phosphatidylcholine (PC, PC-O).

| DAS-28               |                          |                      |                |         |
|----------------------|--------------------------|----------------------|----------------|---------|
| Metabolite           | Pathway Effected         | Metabolite Class     | Spearman's rho | p value |
| TG 54:0              | FA Metabaolism           | Sat. Triglycerides   | -0.4897        | 0.0013  |
| TG 52:0              | FA Metabaolism           | Sat. Triglycerides   | -0.4589        | 0.0029  |
| TG 53:0              | FA Metabaolism           | Sat. Triglycerides   | -0.4553        | 0.0032  |
| TG 56:0              | FA Metabaolism           | Sat. Triglycerides   | -0.4482        | 0.0037  |
| TG 54:1              | FA Metabaolism           | Unsat. Triglyceries  | -0.4439        | 0.0041  |
| TG 45:0              | FA Metabaolism           | Sat. Triglycerides   | -0.4394        | 0.0046  |
| TG 48:0              | FA Metabaolism           | Sat. Triglycerides   | -0.4332        | 0.0052  |
| TG 50:0              | FA Metabaolism           | Sat. Triglycerides   | -0.4218        | 0.0067  |
| TG 55:1              | FA Metabaolism           | Unsat. Triglyceries  | -0.4152        | 0.0077  |
| TG 49:0              | FA Metabaolism           | Sat. Triglycerides   | -0.4146        | 0.0078  |
| TG 51:0              | FA Metabaolism           | Sat. Triglycerides   | -0.4083        | 0.0089  |
| TG 47:0              | FA Metabaolism           | Sat. Triglycerides   | -0.4066        | 0.0092  |
| TG 52:1              | FA Metabaolism           | Unsat. Triglyceries  | -0.4041        | 0.0097  |
| TG 56:1              | FA Metabaolism           | Unsat. Triglyceries  | -0.3961        | 0.0114  |
| TG 46:0              | FA Metabaolism           | Sat. Triglycerides   | -0.3932        | 0.0121  |
| TG 50:1              | FA Metabaolism           | Unsat. Triglyceries  | -0.3887        | 0.0132  |
| LPE 22:6             | FA Metabolism            | Unsat. Lysolecithins | 0.378          | 0.0162  |
| TG 44:0              | FA Metabaolism           | Sat. Triglycerides   | -0.3724        | 0.018   |
| TG 47:1              | FA Metabaolism           | Unsat. Triglyceries  | -0.3685        | 0.0193  |
| TG 53:1              | FA Metabaolism           | Unsat. Triglyceries  | -0.3583        | 0.0232  |
| TG 57:1              | FA Metabaolism           | Unsat. Triglyceries  | -0.3508        | 0.0264  |
| TG 58:0              | FA Metabaolism           | Sat. Triglycerides   | -0.3482        | 0.0277  |
| PC 36:5              | FA Metabolism            | Phosphatidylcholines | 0.3443         | 0.0296  |
| Oxaloacetic acid     | Citric Acid Cycle        | Oxaloacetates        | 0.342          | 0.0308  |
| TG 45:1              | FA Metabaolism           | Unsat. Triglyceries  | -0.3403        | 0.0316  |
| TG 46:1              | FA Metabaolism           | Unsat. Triglyceries  | -0.3379        | 0.033   |
| TG 44:1              | FA Metabaolism           | Unsat. Triglyceries  | -0.3364        | 0.0338  |
| TG 46:2              | FA Metabaolism           | Unsat. Triglyceries  | -0.3351        | 0.0346  |
| Hypoxanthine         | Purine Biosynthesis      | Hypoxanthines        | -0.333         | 0.0357  |
| PC 38:5              | FA Metabolism            | Phosphatidylcholines | 0.3321         | 0.0363  |
| Gluconolactone       | Tricarboxylic Acid Cycle | Gluconates           | -0.3291        | 0.0381  |
| TG 54:2              | FA Metabaolism           | Unsat. Triglyceries  | -0.3197        | 0.0443  |
| PC O-38:8            | FA Metabolism            | Phosphatidylcholines | 0.3182         | 0.0454  |
| TG 56:2              | FA Metabaolism           | Unsat. Triglyceries  | -0.3161        | 0.0469  |
| Secoisolariciresinol | Gut Microflora           | Lignan               | 0.3141         | 0.0484  |
| TG 51:1              | FA Metabaolism           | Unsat. Triglyceries  | -0.3139        | 0.0486  |

**Table S6.** Metabolites of interest (p<0.05) identified in volcano plots to display a correction towards healthy control following MTX therapy. Fatty acid (FA); ceramide (Cer); triglyceride (TG).

|                   |                  | Control V. Disease |          | Disease V. MTX |          |
|-------------------|------------------|--------------------|----------|----------------|----------|
| Compound          | Metabolite Class | FC                 | p value  | FC             | p value  |
| Homogentisic Acid | Carbocyclic Acid | 0.29183            | 1.03E-08 | 1.4852         | 0.043844 |
| FA 22:2           | Fatty Acids      | 2.1546             | 3.58E-06 | 0.5811         | 0.000907 |
| FA 18:3           | Fatty Acids      | 2.9349             | 1.77E-05 | 0.55334        | 0.020167 |
| Cer d34:1         | Ceramides        | 1.3169             | 0.001178 | 0.86931        | 0.0178   |
| FA 16:1           | Fatty Acids      | 2.7461             | 7.06E-05 | 0.50124        | 0.008705 |
| FA 17:1           | Fatty Acids      | 2.3176             | 8.34E-05 | 0.54271        | 0.006529 |
| FA 18:2           | Fatty Acids      | 1.944              | 0.00037  | 0.64154        | 0.015671 |
| TG 59:2           | Triglycerides    | 0.56996            | 0.000422 | 1.5258         | 0.013044 |
| FA 14:1           | Fatty Acids      | 2.1018             | 0.00233  | 0.54941        | 0.015211 |
| Oleic Acid        | Fatty Acids      | 2.7812             | 0.001082 | 0.58722        | 0.039712 |
| TG 46:3           | Triglycerides    | 0.50138            | 0.002935 | 1.7762         | 0.020033 |
| TG 57:2           | Triglycerides    | 0.64429            | 0.003159 | 1.3611         | 0.025562 |
| TG 56:0           | Triglycerides    | 0.74476            | 0.006116 | 1.4258         | 0.027048 |
| TG 54:0           | Triglycerides    | 0.62508            | 0.006769 | 1.7188         | 0.020947 |
| Cer d34:2         | Ceramides        | 1.2055             | 0.007311 | 0.87625        | 0.048301 |
| TG 44:2           | Triglycerides    | 0.41224            | 0.007637 | 2.0039         | 0.027111 |
| TG 57:1           | Triglycerides    | 0.63338            | 0.00917  | 1.5406         | 0.028867 |
| TG 47:2           | Triglycerides    | 0.58704            | 0.009189 | 1.5807         | 0.044277 |
| TG 45:1           | Triglycerides    | 0.45352            | 0.009694 | 1.5532         | 0.017762 |
| TG 42:2           | Triglycerides    | 0.39772            | 0.009718 | 2.1488         | 0.026871 |
| TG 55:1           | Triglycerides    | 0.55863            | 0.010045 | 1.4578         | 0.037719 |
| TG 48:4           | Triglycerides    | 0.56497            | 0.012059 | 1.7526         | 0.038033 |
| TG 42:3           | Triglycerides    | 0.45987            | 0.013325 | 1.9323         | 0.017557 |
| TG 48:3           | Triglycerides    | 0.59209            | 0.013964 | 1.8165         | 0.019513 |
| TG 56:2           | Triglycerides    | 0.55435            | 0.016234 | 1.6464         | 0.04153  |
| TG 53:0           | Triglycerides    | 0.69101            | 0.018404 | 1.4272         | 0.039637 |
| TG 45:0           | Triglycerides    | 0.50201            | 0.018973 | 1.3606         | 0.015729 |
| TG 44:1           | Triglycerides    | 0.33049            | 0.020953 | 2.0603         | 0.02451  |
| TG 44:0           | Triglycerides    | 0.28817            | 0.021253 | 2.3958         | 0.009258 |
| TG 48:2           | Triglycerides    | 0.64105            | 0.025628 | 1.6087         | 0.049873 |
| TG 42:1           | Triglycerides    | 0.2822             | 0.025623 | 2.0915         | 0.028198 |
| TG 46:1           | Triglycerides    | 0.42833            | 0.029613 | 2.0986         | 0.027198 |
| TG 52:0           | Triglycerides    | 0.61071            | 0.033974 | 1.7765         | 0.036032 |
| TG 47:0           | Triglycerides    | 0.56843            | 0.035839 | 1.3943         | 0.047854 |
| Cer d33:1         | Ceramides        | 1.155              | 0.0461   | 0.85115        | 0.028384 |

**Table S7.** ROC analysis of metabolite levels between responders and non-responders defined by  $\delta$ DAS-28(-1.2) after 16 weeks of MTX therapy. Phosphoethanolamines (PE-P); phosphatidylcholines (PC-P, PC-O, PC); lysophosphatidylcholines (LPC); fatty acid (FA); carnitine (CAR).

| Compound                      | Metabolite Class           | AUC     | T-Test   | Log2 FC  |
|-------------------------------|----------------------------|---------|----------|----------|
| 2-Amino-3-methoxybenzoic acid | Aminobenzoates             | 0.87879 | 0.003899 | -4.5739  |
| 3-Methyladipic acid           | Adipates                   | 0.87879 | 0.003968 | -0.69398 |
| Nicotinamide                  | Pyridines                  | 0.84848 | 0.021258 | -1.6245  |
| Mandelic acid                 | Carbocyclic Acids          | 0.84848 | 0.007704 | -0.7225  |
| Orthanilic acid               | Sulfanilic Acids           | 0.84848 | 0.006789 | -1.096   |
| N-Acetyltryptophan            | Indoles                    | 0.83838 | 0.004472 | -0.42204 |
| Isoheptadecanoic Acid         | Fatty Acids                | 0.82828 | 0.017848 | 0.8043   |
| Stachydrine                   | Imino Acids                | 0.80808 | 0.01925  | 1.8515   |
| Tyrosine                      | Aromatic Amino Acids       | 0.80808 | 0.030277 | 1.3871   |
| Acetylenedicarboxylic acid    | Alkynes                    | 0.80808 | 0.019285 | -0.31704 |
| Aspartic Acid                 | Acidic Amino Acids         | 0.79798 | 0.019278 | -0.52917 |
| Acetaminophen                 | Acetanilides               | 0.79798 | 0.015532 | -5.2895  |
| 2-Hydroxyisobutyric acid      | Hydroxybutyrates           | 0.78788 | 0.022503 | -0.7137  |
| Hypoxanthine                  | Hypoxanthines              | 0.78788 | 0.02615  | -1.2261  |
| 6-Hydroxycaproic acid         | Adipates                   | 0.78788 | 0.026694 | -0.43733 |
| 1,5-Anhydrosorbitol           | Hexoses                    | 0.78788 | 0.017151 | 0.4026   |
| Pyroglutamic Acid             | Dipeptides                 | 0.78788 | 0.028985 | -0.28926 |
| Erythronolactone              | Butyrates                  | 0.78788 | 0.032892 | -0.72951 |
| PE P-40:4                     | Phosphoethanolamines       | 0.78788 | 0.044687 | -0.57956 |
| PC P-42:2                     | Phosphatidylcholines       | 0.78788 | 0.020008 | 0.59889  |
| Tartaric Acid                 | Dicarboxylic Acids         | 0.77778 | 0.034459 | -0.53226 |
| N-Methylalanine               | Dipeptides                 | 0.77778 | 0.018695 | -0.63236 |
| Methylacetate                 | Acetates                   | 0.77778 | 0.026674 | -0.66585 |
| Inosine                       | Purine Nucleosides         | 0.77778 | 0.043939 | -1.2844  |
| PC P-34:0                     | Phosphatidylcholines       | 0.77778 | 0.065236 | 0.37313  |
| Valine                        | Branched-chain Amino Acids | 0.76768 | 0.028678 | -0.43714 |
| Glycolic acid                 | Glycolates                 | 0.76768 | 0.067438 | -0.38357 |
| Choline                       | Ethanolamines              | 0.76768 | 0.017433 | -0.54516 |
| Glutamic acid                 | Acidic Amino Acids         | 0.76768 | 0.021183 | -0.64906 |
| LPC 22:5                      | Lysophosphatidylcholines   | 0.76768 | 0.13774  | -0.46771 |
| PC P-42:5                     | Phosphatidylcholines       | 0.76768 | 0.037623 | 0.51995  |
| Itaconic Acid                 | Succinates                 | 0.75758 | 0.088784 | 0.24652  |
| indole-3-propionic acid       | Indoles                    | 0.75758 | 0.04064  | 1.2257   |
| conduritol-beta-epoxide       | Cyclitols                  | 0.75758 | 0.024536 | 1.1941   |
| N-Methylvaline                | Branched-chain Amino Acids | 0.75758 | 0.035791 | -0.39955 |
| alpha-Hydroxyhippuric acid    | Hippurates                 | 0.75758 | 0.096124 | -0.84907 |
| Histidine                     | Cyclic Amino Acids         | 0.75758 | 0.019572 | -0.43478 |
| Methylsuccinic acid           | Succinates                 | 0.75758 | 0.017819 | -0.52678 |
| N,N-Dimethylformamide         | Formamides                 | 0.75758 | 0.037487 | -0.31302 |
| FA 22:5                       | Fatty Acids                | 0.75758 | 0.14831  | -0.92727 |
| PC 36:4                       | Phosphatidylcholines       | 0.75758 | 0.08112  | 0.26191  |
| PC O-44:5                     | Phosphatidylcholines       | 0.75758 | 0.040682 | 0.58488  |
| CAR 12:0                      | Carnitine                  | 0.75758 | 0.0748   | -0.51045 |

PC P-44:5 or PC O-44:6

Phosphatidylcholines

0.75758

0.039599

0.54814

---
